# Supplementary material
Source: HighWire-hosted journal article supplement (https://ijgc.bmj.com/highwire/filestream/17628/field_highwire_adjunct_files/0/ijgc-2020-001924supp001_data_supplement.pdf)
Supplement: ijgc-2020-001924supp001_data_supplement.pdf [file ijgc-2020-001924supp001_data_supplement.pdf]

Supplemental Table 1. Characteristics of Patients In Study vs Not in Study

| Characteristics                                                          | In Study<br>N=378 | Not in Study<br>N=356 | Deceased the<br>time of survey<br>N=64 | P*     |
|--------------------------------------------------------------------------|-------------------|-----------------------|----------------------------------------|--------|
| <b>Characteristics at the time of the surgery</b>                        |                   |                       |                                        |        |
| Age (years), mean (SD)                                                   | 64.2 (9.2)        | 63.5 (10.0)           | 73.1 (10.7)                            | 0.09   |
| BMI (kg/m <sup>2</sup> ), median (IQR)                                   | 32.7 (27.6, 38.4) | 34.6 (28.4, 41.2)     | 31.3 (27.5, 36.9)                      | 0.005  |
| BMI (kg/m <sup>2</sup> ), N (%)                                          |                   |                       |                                        | 0.02   |
| <25.0                                                                    | 49/376 (13.0)     | 40/352 (11.4)         | 10 (15.6)                              |        |
| 25.0-29.9                                                                | 90/376 (23.9)     | 67/352 (19.0)         | 20 (31.3)                              |        |
| 30.0-39.9                                                                | 164/376 (43.6)    | 142/352 (40.3)        | 23 (35.9)                              |        |
| 40.0 or higher                                                           | 73/376 (19.4)     | 103/352 (29.3)        | 11 (17.2)                              |        |
| Comorbidities, N (%)                                                     |                   |                       |                                        |        |
| Diabetes                                                                 | 59 (15.6)         | 66 (18.5)             | 20 (31.3)                              | 0.29   |
| CHF                                                                      | 8 (2.1)           | 2 (0.6)               | 4 (6.3)                                | 0.11   |
| Moderate/severe renal disease                                            | 5 (1.3)           | 7 (2.0)               | 5 (7.8)                                | 0.49   |
| <b>Surgical details</b>                                                  |                   |                       |                                        |        |
| FIGO grade, N (%)                                                        |                   |                       |                                        | <0.001 |
| 1 or 2                                                                   | 272 (72.0)        | 274 (77.0)            | 27 (42.2)                              |        |
| 3                                                                        | 106 (28.0)        | 82 (23.0)             | 37 (57.8)                              |        |
| FIGO stage, N (%)                                                        |                   |                       |                                        | 0.31   |
| I/II                                                                     | 346 (91.5)        | 318 (89.3)            | 39 (60.9)                              |        |
| III/IV                                                                   | 32 (8.5)          | 38 (10.7)             | 25 (39.1)                              |        |
| Histology, N (%) <sup>†</sup>                                            |                   |                       |                                        | 0.96   |
| Non-endometrioid                                                         | 60 (15.9)         | 56 (15.7)             | 26 (40.6)                              |        |
| Endometrioid                                                             | 318 (84.1)        | 300 (84.3)            | 38 (59.4)                              |        |
| Study cohort, N (%) <sup>‡</sup>                                         |                   |                       |                                        | 0.30   |
| LND cohort                                                               | 251 (66.4)        | 249 (69.9)            | 50 (78.1)                              |        |
| SLN cohort                                                               | 127 (33.6)        | 107 (30.1)            | 14 (21.9)                              |        |
| Total nodes removed via SLN among those with nodes removed, median (IQR) | 3 (2, 4)          | 3 (2, 4)              | 3 (1, 3)                               | 0.50   |
| LND performed, n (%)                                                     |                   |                       |                                        | 0.02   |
| No                                                                       | 107 (28.3)        | 87 (24.4)             | 13 (20.3)                              |        |
| Pelvic only                                                              | 162 (42.9)        | 189 (53.1)            | 22 (34.4)                              |        |
| Paraaortic only                                                          | 3 (0.8)           | 5 (1.4)               | -                                      |        |
| Pelvic and paraaortic                                                    | 106 (28.0)        | 75 (21.1)             | 29 (45.3)                              |        |
| Total nodes removed via LND among those with nodes removed, median (IQR) |                   |                       |                                        |        |
| Total pelvic and paraaortic                                              | 29 (21, 40)       | 27 (18, 38)           | 25 (19, 37)                            | 0.07   |
| Total pelvic                                                             | 24 (17, 33)       | 24 (17, 32)           | 20 (12, 28)                            | 0.66   |
| Total paraaortic                                                         | 13 (9, 19)        | 13 (9, 20)            | 10 (8, 15)                             | 0.90   |
| Total nodes removed by any means (SLN+ LND), median (IQR)                | 24 (6, 36)        | 21 (7, 34)            | 22 (9, 30)                             | 0.70   |
| <b>Adjuvant EBRT, N (%)</b>                                              |                   |                       |                                        | 0.43   |
| No                                                                       | 345 (91.3)        | 315 (88.5)            | 45 (70.3)                              |        |
| Yes                                                                      | 18 (4.8)          | 24 (6.7)              | 10 (15.6)                              |        |
| Unknown                                                                  | 15 (4.0)          | 17 (4.8)              | 9 (14.1)                               |        |

Abbreviations: BMI, body mass index; CHF, congestive heart failure; EBRT, external beam radiation therapy; FIGO, International Federation of Gynecology and Obstetrics; IQR, interquartile range; LND, lymphadenectomy; SD, standard deviation SLN, sentinel lymph node.

\*Comparison between “In Study” and “Not in Study” only; two-sample t test P value presented for age, Wilcoxon rank sum test P values presented for all other continuous variables, and chi-square or Fisher’s exact test P values presented for categorical variables.

†Endometrioid histology includes endometrioid and mixed endometrioid and mucinous histology; non-endometrioid histology includes serous, clear cell, carcinosarcoma, undifferentiated, mixed serous, mixed clear cell, and mixed undifferentiated histology.

‡The LND cohort consists of patients who underwent bilateral LND prior to SLN implementation at our institution or as “backup” after SLN mapping and the SLN cohort consists of patients who underwent a SLN biopsy with or without side-specific LND.

Supplemental Table 2. Characteristics of Patients Stratified by Method of Nodal Sampling

| Characteristic                                    | LND cohort        | SLN cohort        | HYST only cohort  | LND cohort vs HYST only cohort | SLN cohort vs HYST only cohort |
|---------------------------------------------------|-------------------|-------------------|-------------------|--------------------------------|--------------------------------|
|                                                   | N=251             | N=127             | N=165             | $P^{\dagger}$                  | $P^{\dagger}$                  |
| <b>Characteristics at the time of the surgery</b> |                   |                   |                   |                                |                                |
| Age (years), mean (SD)                            | 64.2 (9.1)        | 64.1 (9.4)        | 62.1 (10.7)       | 0.004                          | 0.02                           |
| BMI (kg/m <sup>2</sup> ), median (IQR)            | 32.2 (27.1, 37.7) | 33.4 (28.6, 40.0) | 32.7 (26.8, 40.9) | 0.38                           | 0.37                           |
| BMI (kg/m <sup>2</sup> ), N (%)                   |                   |                   |                   | 0.005                          | 0.02                           |
| <25.0                                             | 39/249 (15.7)     | 10 (7.9)          | 31/162 (19.1)     |                                |                                |
| 25.0-29.9                                         | 57/249 (22.9)     | 33 (26.0)         | 33/162 (20.4)     |                                |                                |
| 30.0-39.9                                         | 112/249 (45.0)    | 52 (40.9)         | 51/162 (31.5)     |                                |                                |
| 40.0 or higher                                    | 41/249 (16.5)     | 32 (25.2)         | 47/162 (29.0)     |                                |                                |
| Comorbidities, N (%)                              |                   |                   |                   |                                |                                |
| Diabetes                                          | 41 (16.3)         | 18 (14.2)         | 33 (20.0)         | 0.34                           | 0.19                           |
| CHF                                               | 2 (0.8)           | 6 (4.7)           | 1 (0.6)           | 0.99                           | 0.046                          |
| Moderate/severe renal disease                     | 3 (1.2)           | 2 (1.6)           | 3 (1.8)           | 0.69                           | 0.99                           |
| <b>Surgical details</b>                           |                   |                   |                   |                                |                                |
| FIGO grade, N (%)                                 |                   |                   |                   | <0.001                         | <0.001                         |
| 1 or 2                                            | 171 (68.1)        | 101 (79.5)        | 159 (96.4)        |                                |                                |
| 3                                                 | 80 (31.9)         | 26 (20.5)         | 6 (3.6)           |                                |                                |
| FIGO stage, N (%)                                 |                   |                   |                   | 0.01                           | 0.18                           |
| I/II                                              | 227 (90.4)        | 119 (93.7)        | 160 (97.0)        |                                |                                |
| III/IV                                            | 24 (9.6)          | 8 (6.3)           | 5 (3.0)           |                                |                                |
| Histology, N (%) <sup>‡</sup>                     |                   |                   |                   | <0.001                         | <0.001                         |
| Non-endometrioid                                  | 43 (17.1)         | 17 (13.4)         | 3 (1.8)           |                                |                                |
| Endometrioid                                      | 208 (82.9)        | 110 (86.6)        | 162 (98.2)        |                                |                                |
| Adjuvant EBRT, N (%)                              |                   |                   |                   | 0.03                           | 0.31                           |
| No                                                | 227 (90.4)        | 118 (92.9)        | 157 (95.2)        |                                |                                |
| Yes                                               | 14 (5.6)          | 4 (3.1)           | 1 (0.6)           |                                |                                |
| Unknown                                           | 10 (4.0)          | 5 (3.9)           | 7 (4.2)           |                                |                                |

Abbreviations: BMI, body mass index; CHF, congestive heart failure; EBRT, external beam radiation therapy; FIGO, International Federation of Gynecology and Obstetrics; HYST, hysterectomy; IQR, interquartile range; LND, lymphadenectomy; SD, standard deviation SLN, sentinel lymph node.

\*The LND cohort consists of patients who underwent bilateral LND prior to SLN implementation at our institution or as “backup” after SLN mapping and the SLN cohort consists of patients who underwent a SLN biopsy with or without side-specific LND.

†Two-sample t-test P value presented for age, Wilcoxon rank-sum test P values presented for all other continuous variables, and chi-square or Fisher’s exact test P values presented for categorical variables.

‡Endometrioid histology includes endometrioid and mixed endometrioid and mucinous histology; non-endometrioid histology includes serous, clear cell, carcinosarcoma, mixed serous, and mixed clear cell histology.
